# Supplementary material
Source: MDPI journal article supplement (https://www.mdpi.com/2076-3905/5/3/18)
Supplement: s1 [file s1]

# Supplementary Materials: MicroRNA Profile of Lung Tumor Tissues Is Associated with a High Risk Plasma miRNA Signature

Orazio Fortunato <sup>1</sup>, Carla Verri <sup>1</sup>, Ugo Pastorino <sup>2</sup>, Gabriella Sozzi <sup>1,\*</sup> and Mattia Boeri <sup>1</sup>

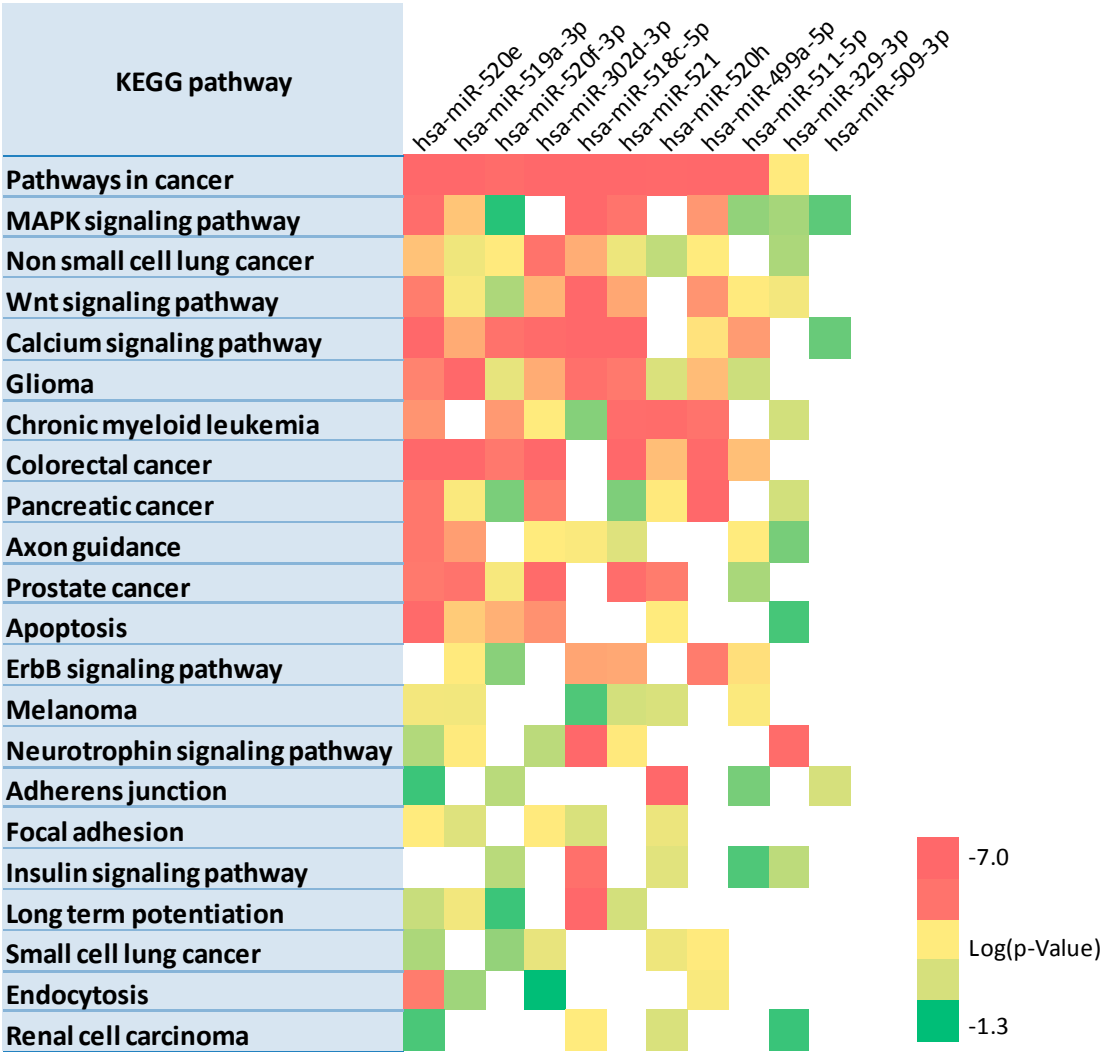

**Figure S1.** Heat map of KEGG pathway enrichment analysis using miRWalk2.0 and considering 11 mature miRNAs differentially expressed between lung cancer patients with high and intermediate/low risk MSC. Adjusted *p*-value < 0.05 after FDR correction.

**Table S1.** Class comparison analysis of microRNA expression in tumor tissue of lung cancer patients stratified according to status at five years.

| MicroRNA         | Parametric<br><i>p</i> -Value | Permutation<br><i>p</i> -Value | Geom Mean of<br>Dead Patients | Geom Mean of<br>Alive Patients | Fold-Change |
|------------------|-------------------------------|--------------------------------|-------------------------------|--------------------------------|-------------|
| hsa-mir-499a-5p  | 0.0058                        | 0.0058                         | 1912.49                       | 1152.67                        | 1.67        |
| hsa-mir-212-prec | 0.0066                        | 0.0084                         | 1692.4                        | 1241.48                        | 1.37        |
| hsa-mir-429      | 0.0079                        | 0.0074                         | 1349.96                       | 910.32                         | 1.49        |

Type of univariate test used: two-sample *t*-test. Permutation *p*-values for significant miRNAs were computed based on 10,000 random permutations. Nominal significance level of each univariate test: 0.01.
